# Supplementary material for: Associations between social fragmentation, socioeconomic deprivation and suicide risk across 1887 municipalities in Japan, 2009–2017: a spatial analysis using the Bayesian hierarchical model
Source: HighWire-hosted journal article supplement (doi:10.1136/bmjopen-2022-063255), 2022-08-01
Supplement: bmjopen-2022-063255supp001_data_supplement.pdf [file bmjopen-2022-063255supp001_data_supplement.pdf]

**Appendix Table 1. Rate ratios (and 95% credible intervals) of suicide among the Japanese population associated with one standard deviation increase in levels of each of the areas' socioeconomic characteristics.**

|                                  | Unadjusted |              | Adjusted for all other variables |              |
|----------------------------------|------------|--------------|----------------------------------|--------------|
| <b>Social fragmentation</b>      | 1.03       | (1.02, 1.04) | 1.03                             | (1.02, 1.04) |
| <b>Socioeconomic deprivation</b> | 1.06       | (1.05, 1.07) | 1.05                             | (1.04, 1.06) |
| <b>Urbanicity</b>                | 0.92       | (0.90, 0.93) | 0.90                             | (0.89, 0.91) |

**Appendix Table 2. Rate ratios (and 95% credible intervals) of suicide in Japanese men and women aged 0-39, 40-59, 60+ years associated with one standard deviation increase in levels of each areas' socioeconomic characteristics after adjustment for all other variables.**

|                                  | Males aged 0-39  |              | Females aged 0-39  |              |
|----------------------------------|------------------|--------------|--------------------|--------------|
| <b>Social fragmentation</b>      | 1.06             | (1.04, 1.07) | 1.12               | (1.10, 1.15) |
| <b>Socioeconomic deprivation</b> | 1.01             | (1.00, 1.03) | 1.00               | (0.97, 1.02) |
| <b>Urbanicity</b>                | 0.89             | (0.87, 0.91) | 1.03               | (0.99, 1.06) |
|                                  | Males aged 40-59 |              | Females aged 40-59 |              |
| <b>Social fragmentation</b>      | 1.03             | (1.02, 1.04) | 1.06               | (1.04, 1.08) |
| <b>Socioeconomic deprivation</b> | 1.09             | (1.08, 1.11) | 1.06               | (1.04, 1.08) |
| <b>Urbanicity</b>                | 0.86             | (0.84, 0.87) | 1.01               | (0.99, 1.04) |
|                                  | Males aged 60 +  |              | Females aged 60+   |              |
| <b>Social fragmentation</b>      | 1.00             | (0.98, 1.02) | 0.98               | (0.96, 1.00) |
| <b>Socioeconomic deprivation</b> | 1.11             | (1.09, 1.13) | 1.01               | (0.99, 1.03) |
| <b>Urbanicity</b>                | 0.88             | (0.86, 0.90) | 0.93               | (0.91, 0.96) |

**Appendix Table 3. Results’ summary of the negative binomial regression analysis considering interaction terms between socioeconomic characteristics (fragmentation, deprivation, and urbanicity) and gender or age.**

|                           | Model without interaction terms |              |         | Model with interaction term between gender and fragmentation |              |         | Model with interaction term between age and fragmentation |              |              | Model with interaction term between gender and deprivation |              |         | Model with interaction term between age and deprivation |              |         | Model with interaction term between gender and urbanity |              |         | Model with interaction term between age and urbanity |              |         |
|---------------------------|---------------------------------|--------------|---------|--------------------------------------------------------------|--------------|---------|-----------------------------------------------------------|--------------|--------------|------------------------------------------------------------|--------------|---------|---------------------------------------------------------|--------------|---------|---------------------------------------------------------|--------------|---------|------------------------------------------------------|--------------|---------|
|                           | IRR                             | 95%CI        | p value | IRR                                                          | 95%CI        | p value | IRR                                                       | 95%CI        | p value      | IRR                                                        | 95%CI        | p value | IRR                                                     | 95%CI        | p value | IRR                                                     | 95%CI        | p value | IRR                                                  | 95%CI        | p value |
| Females (ref. males)      | 0.98                            | (0.96, 0.99) | <0.001  | 0.96                                                         | (0.95, 0.97) | <0.001  | 0.98                                                      | (0.96, 0.99) | <0.001       | 0.98                                                       | (0.97, 0.99) | 0.001   | 0.98                                                    | (0.96, 0.99) | <0.001  | 0.91                                                    | (0.90, 0.93) | <0.001  | 0.98                                                 | (0.96, 0.99) | <0.001  |
| Age (ref. 0-39y)          |                                 |              |         |                                                              |              |         |                                                           |              |              |                                                            |              |         |                                                         |              |         |                                                         |              |         |                                                      |              |         |
| 40-59y                    | 1.01                            | (1.00, 1.03) | 0.119   | 1.01                                                         | (1.00, 1.03) | 0.119   | 1.02                                                      | (1.00, 1.04) | 0.013        | 1.01                                                       | (1.00, 1.03) | 0.128   | 1.01                                                    | (0.99, 1.02) | 0.268   | 1.01                                                    | (1.00, 1.03) | 0.154   | 1.04                                                 | (1.02, 1.06) | <0.001  |
| 60+y                      | 1.01                            | (1.00, 1.03) | 0.075   | 1.01                                                         | (1.00, 1.03) | 0.054   | 1.04                                                      | (1.02, 1.05) | <0.001       | 1.01                                                       | (1.00, 1.03) | 0.087   | 1.01                                                    | (1.00, 1.03) | 0.116   | 1.02                                                    | (1.00, 1.03) | 0.044   | 1.06                                                 | (1.04, 1.08) | <0.001  |
| Social fragmenation       | 1.04                            | (1.03, 1.05) | <0.001  | 1.02                                                         | (1.01, 1.03) | <0.001  | 1.07                                                      | (1.06, 1.09) | <0.001       | 1.04                                                       | (1.03, 1.05) | <0.001  | 1.04                                                    | (1.03, 1.05) | <0.001  | 1.04                                                    | (1.03, 1.05) | <0.001  | 1.04                                                 | (1.03, 1.05) | <0.001  |
| Interaction with gender   |                                 |              |         | 1.05                                                         | (1.03, 1.06) | <0.001  |                                                           |              |              |                                                            |              |         |                                                         |              |         |                                                         |              |         |                                                      |              |         |
| Interaction with age      |                                 |              |         |                                                              |              |         |                                                           |              |              |                                                            |              |         |                                                         |              |         |                                                         |              |         |                                                      |              |         |
| 40-59y                    |                                 |              |         |                                                              |              |         |                                                           | 0.98         | (0.97, 1.00) | 0.021                                                      |              |         |                                                         |              |         |                                                         |              |         |                                                      |              |         |
| 60+y                      |                                 |              |         |                                                              |              |         |                                                           | 0.93         | (0.92, 0.95) | <0.001                                                     |              |         |                                                         |              |         |                                                         |              |         |                                                      |              |         |
| Socioeconomic deprivation | 1.05                            | (1.04, 1.06) | <0.001  | 1.05                                                         | (1.05, 1.06) | <0.001  | 1.05                                                      | (1.05, 1.06) | <0.001       | 1.07                                                       | (1.06, 1.07) | <0.001  | 1.03                                                    | (1.01, 1.04) | <0.001  |                                                         |              |         |                                                      |              |         |
| Interaction with gender   |                                 |              |         |                                                              |              |         |                                                           |              |              | 0.96                                                       | (0.95, 0.98) | <0.001  |                                                         |              |         |                                                         |              |         |                                                      |              |         |
| Interaction with age      |                                 |              |         |                                                              |              |         |                                                           |              |              |                                                            |              |         |                                                         |              |         |                                                         |              |         |                                                      |              |         |
| 40-59y                    |                                 |              |         |                                                              |              |         |                                                           |              |              |                                                            |              |         | 1.05                                                    | (1.03, 1.07) | <0.001  |                                                         |              |         |                                                      |              |         |
| 60+y                      |                                 |              |         |                                                              |              |         |                                                           |              |              |                                                            |              |         | 1.02                                                    | (1.01, 1.04) | 0.002   |                                                         |              |         |                                                      |              |         |
| Urbanicity                | 0.90                            | (0.89, 0.91) | <0.001  | 0.90                                                         | (0.89, 0.91) | <0.001  | 0.90                                                      | (0.89, 0.91) | <0.001       | 0.90                                                       | (0.89, 0.91) | <0.001  | 0.90                                                    | (0.89, 0.91) | <0.001  | 0.86                                                    | (0.85, 0.87) | <0.001  | 0.94                                                 | (0.93, 0.96) | <0.001  |
| Interaction with gender   |                                 |              |         |                                                              |              |         |                                                           |              |              |                                                            |              |         |                                                         |              |         | 1.12                                                    | (1.10, 1.13) | <0.001  |                                                      |              |         |
| Interaction with age      |                                 |              |         |                                                              |              |         |                                                           |              |              |                                                            |              |         |                                                         |              |         |                                                         |              |         |                                                      |              |         |
| 40-59y                    |                                 |              |         |                                                              |              |         |                                                           |              |              |                                                            |              |         |                                                         |              |         |                                                         |              |         | 0.96                                                 | (0.94, 0.97) | <0.001  |
| 60+y                      |                                 |              |         |                                                              |              |         |                                                           |              |              |                                                            |              |         |                                                         |              |         |                                                         |              |         | 0.93                                                 | (0.91, 0.94) | <0.001  |

**Appendix Table 4. Number and rates of suicide in 2009 and 2017, changes in the number and rates of suicide between 2009 and 2017 among the Japanese population according to gender and age.**

|                      | 2009   |                   | 2017   |                   | Change              |                |                     |                |
|----------------------|--------|-------------------|--------|-------------------|---------------------|----------------|---------------------|----------------|
|                      | Number | Rate <sup>a</sup> | Number | Rate <sup>a</sup> | Number <sup>b</sup> | % <sup>c</sup> | Rate <sup>a,b</sup> | % <sup>c</sup> |
| <b>Men</b>           |        |                   |        |                   |                     |                |                     |                |
| <b>All ages</b>      | 22712  | 36.6              | 14525  | 23.3              | -8187               | -36.0%         | -13.3               | -36.3%         |
| <b>&lt; 20 years</b> | 356    | 3.0               | 395    | 3.5               | 39                  | 11.0%          | 0.5                 | 16.3%          |
| <b>20-29 years</b>   | 2369   | 32.1              | 1580   | 23.8              | -789                | -33.3%         | -8.3                | -26.0%         |
| <b>30-39 years</b>   | 3377   | 35.5              | 1968   | 24.6              | -1409               | -41.7%         | -10.9               | -30.7%         |
| <b>40-49 years</b>   | 3903   | 47.5              | 2637   | 27.0              | -1266               | -32.4%         | -20.6               | -43.3%         |
| <b>50-59 years</b>   | 4960   | 57.7              | 2545   | 32.8              | -2415               | -48.7%         | -24.8               | -43.1%         |
| <b>60-69 years</b>   | 4169   | 49.7              | 2269   | 25.5              | -1900               | -45.6%         | -24.2               | -48.7%         |
| <b>70-79 years</b>   | 2283   | 40.8              | 1815   | 28.7              | -468                | -20.5%         | -12.1               | -29.6%         |
| <b>&gt; 80 years</b> | 1295   | 51.7              | 1316   | 36.4              | 21                  | 1.6%           | -15.3               | -29.5%         |
| <b>Women</b>         |        |                   |        |                   |                     |                |                     |                |
| <b>All ages</b>      | 9257   | 14.2              | 6443   | 9.8               | -2814               | -30.4%         | -4.4                | -30.7%         |
| <b>&lt; 20 years</b> | 205    | 1.8               | 169    | 1.6               | -36                 | -17.6%         | -0.2                | -13.1%         |
| <b>20-29 years</b>   | 1041   | 14.7              | 603    | 9.6               | -438                | -42.1%         | -5.1                | -35.0%         |
| <b>30-39 years</b>   | 1322   | 14.5              | 689    | 8.9               | -633                | -47.9%         | -5.5                | -38.1%         |
| <b>40-49 years</b>   | 1225   | 15.3              | 965    | 10.2              | -260                | -21.2%         | -5.1                | -33.6%         |
| <b>50-59 years</b>   | 1362   | 15.8              | 993    | 12.9              | -369                | -27.1%         | -2.9                | -18.3%         |
| <b>60-69 years</b>   | 1649   | 18.4              | 1012   | 10.9              | -637                | -38.6%         | -7.6                | -41.1%         |
| <b>70-79 years</b>   | 1353   | 19.5              | 1080   | 14.3              | -273                | -20.2%         | -5.2                | -26.5%         |
| <b>&gt; 80 years</b> | 1100   | 21.8              | 932    | 14.1              | -168                | -15.3%         | -7.7                | -35.5%         |

<sup>a</sup>: Suicides per 100,000 population.<sup>b</sup>: Differences between the values of 2017 and 2009.<sup>c</sup>: Percentages of the differences between the 2017 and 2009 values in the 2009 values
